# Supplementary material for: Highlighted Ca2+ imaging with a genetically encoded ‘caged’ indicator
Source: PubMed Central journal article supplement — Sci Rep. 2013 Mar 11;3:1398. doi: 10.1038/srep01398 (PMC3593221; doi:10.1038/srep01398), 2013-03-11
Supplement: srep01398-s2.pdf [file srep01398-s2.pdf]

# **Highlighted Ca<sup>2+</sup> imaging with a genetically-encoded ‘caged’ indicator**

Tomoki Matsuda, Kazuki Horikawa, Kenta Saito & Takeharu Nagai

## **Supplementary Information**

### **Supplementary Figure 1**

Emission spectrum of the TN-XL based indicator with red fluorescent protein as an FRET acceptor.

### **Supplementary Figure 2**

Absorption and emission spectrum of dim variants of Venus.

### **Supplementary Figure 3**

Photoactivation property of TN-XL-based constructs.

### **Supplementary Table 1**

Spectral characteristics of dim variants of Venus.

### **Supplementary Video 1**

Photoactivation and Ca<sup>2+</sup> imaging by PA-TNXL in HeLa cells.

Figure S1. Matsuda et al

**a**

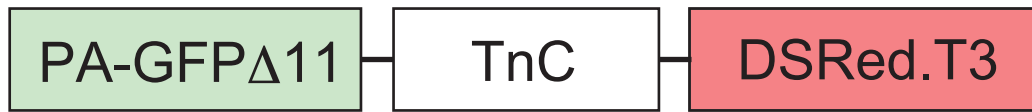

**b**

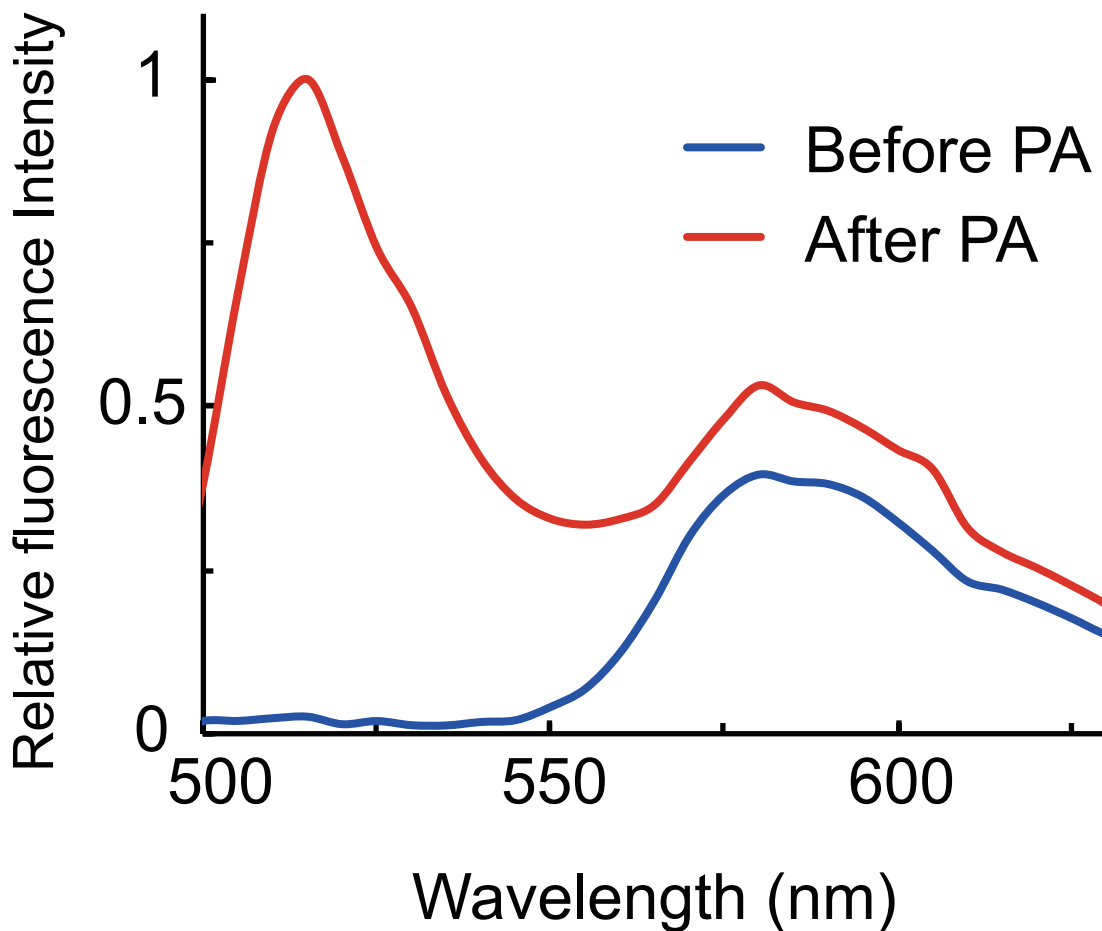

**Supplementary Figure 1. Emission spectrum of the TN-XL based indicator with red fluorescent protein as an FRET acceptor. a**, Domain structure of the construct. PA-GFP with C-terminal 11 amino acids deleted, Ca<sup>2+</sup> binding moiety of TN-XL and full-length DSRed.T3 were tandemly linked (Bevis, BJ. & Glick, BS. Rapidly maturing variants of the *Discosoma* red fluorescent protein (DsRed). *Nat. Biotechnol.* **20**, 83-87 (2002).) . **b**, Emission spectrum of the construct before and after photoactivation.

Figure S2. Matsuda et al

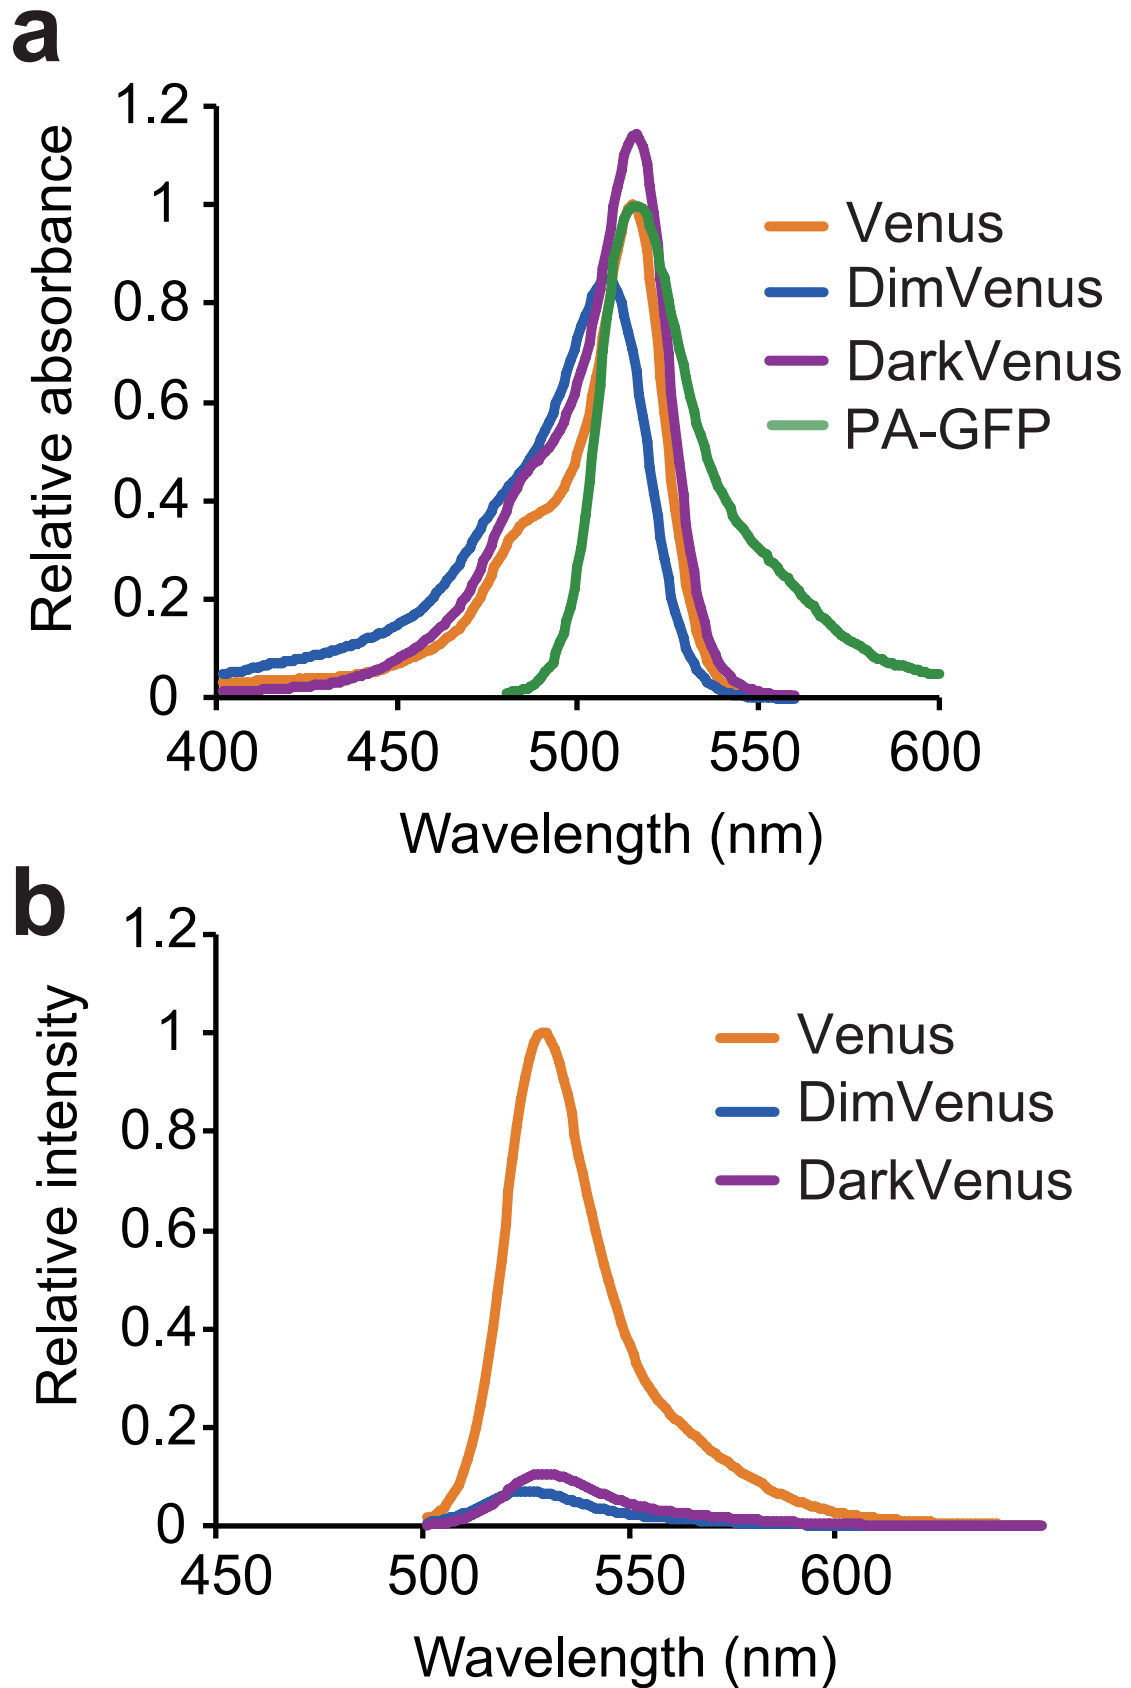

**Supplementary Figure 2. Absorption and emission spectrum of dim variants of Venus. a,** Absorption spectra of Venus, DimVenus and DarkVenus. Emission spectrum of PA-GFP is also shown. **b,** Emission spectrum of Venus, DimVenus and DarkVenus.

Figure S3. Matsuda et al

**a**

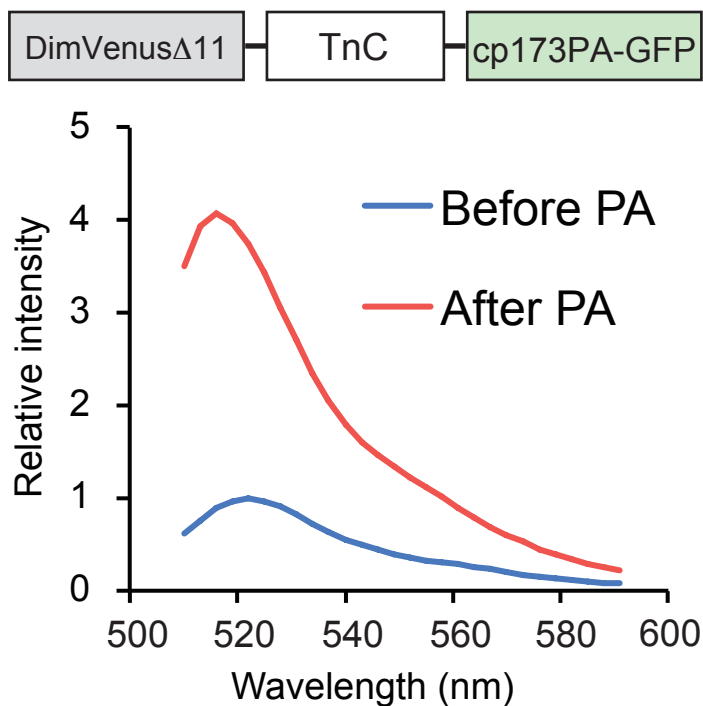

**b**

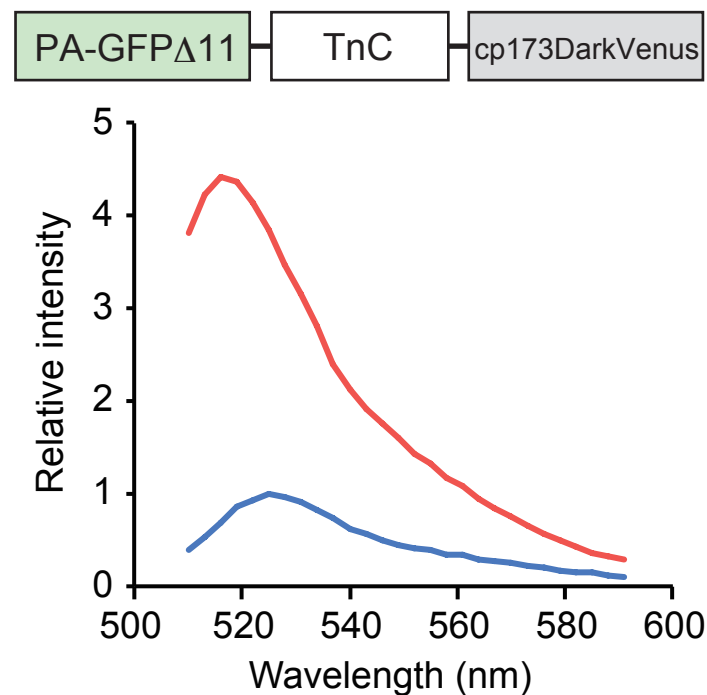

**c**

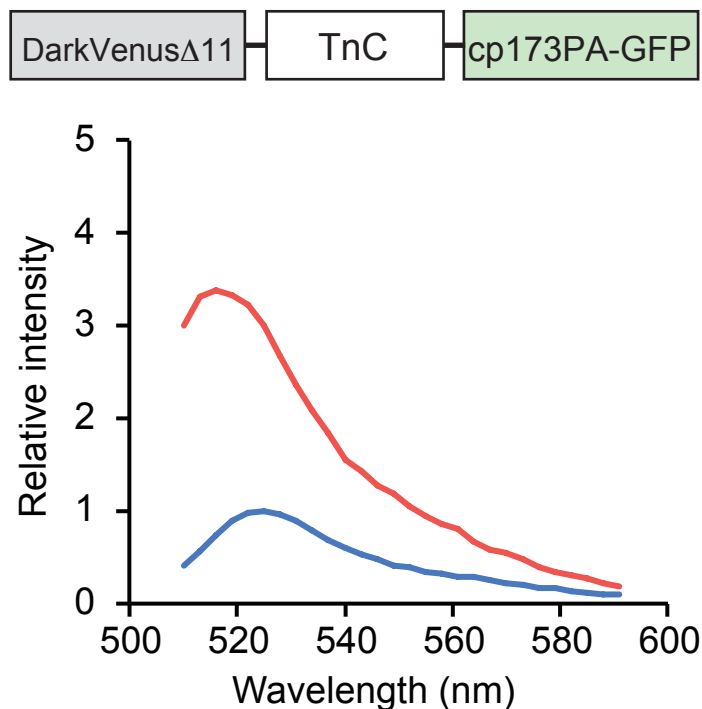

**Supplementary Figure 3. Photoactivation property of TN-XL-based constructs.** Domain structures and emission spectrum before and after photoactivation of TN-XL-based photoactivatable Ca<sup>2+</sup> indicators.

**Supplementary Table 1.** Spectral characteristics of dim variants of Venus

| <b>Protein</b> | <b>Substitutions</b> | <b>Absorption<br/>max (nm)</b> | <b><math>\epsilon^a</math><br/>(<math>10^3\text{M}^{-1}\text{cm}^{-1}</math>)</b> | <b>Emission<br/>max (nm)</b> | <b><math>\Phi^a</math></b> | <b>Brightness<sup>b</sup><br/>(<math>10^3\text{mM}^{-1}\cdot\text{cm}^{-1}</math>)</b> |
|----------------|----------------------|--------------------------------|-----------------------------------------------------------------------------------|------------------------------|----------------------------|----------------------------------------------------------------------------------------|
| Venus          | —                    | 515                            | 92.2                                                                              | 528                          | 0.57                       | 52.6                                                                                   |
| DimVenus       | Y145W                | 508                            | 55.4                                                                              | 525                          | 0.03                       | 1.71                                                                                   |
| DarkVenus      | H148V/Y145W          | 515                            | 74.4                                                                              | 528                          | 0.05                       | 3.73                                                                                   |

<sup>a</sup>The extinction coefficients ( $\epsilon$ ) and quantum yields ( $\Phi$ ) were determined as described<sup>S1</sup>.

<sup>b</sup>Brightness is defined as the product of  $\epsilon$  and  $\Phi$ .
